# Supplementary material
Source: publisher figshare collection journal article supplement (https://gsapubs.figshare.com/ndownloader/files/23299268)
Supplement: Supplementary file 1 [file 23299268]

## Sheet: Supplemental Table 2
TABLE DR2A. GEOMORPHIC, CLIMATE, AND LAND COVER DATA FOR PANAMA WATERSHEDS IN THIS STUDY
WATERSHEDS & RIVERS										GEOMORPHIC AND CLIMATE DATA					LAND COVER PARAMETERS					LAND COVER PARAMETERS
Basin ID	Watershed	River	Type	Sampling UTM-E	Sampling UTM-N	Area (km2)	Max Elev (m)	Max Gradient	Mean Gradient	Annual Avg Low Temp (°C)	Annual Avg High Temp (°C)	Min Avg Pptn (mm)	Max Avg Pptn (mm)		FOREST (%)	AGRICULTURAL LAND (%)	SHRUBLAND & GRASSLAND (%)	OPEN LAND (%)	WATER BODIES (%)	FOREST (m2)	AGRICULTURAL LAND (m2)	SHRUBLAND & GRASSLAND (m2)	OPEN LAND (m2)	WATER BODIES (m2)
BOCAS DEL TORO
1	Changuinola	Rio Changuinola	river	332142	1036119	1786	3310	70	18	22.5	27.5	2400	3400		81.8	15.7	2.5			348835000	67105600	10360500
2	Changuinola	Rio Teribe	major tributary	332017	1036191	953	3341	69	21	22.5	27.5	2400	3400		84.3	13.7	2		84.3	361857000	58646100	8744640
3	Uyama	Rio Uyama	river	354476	1011635	170.251	884	36	11	22.5	27.5	2400	3400		86.9	13.1				147613000	22336900
4	Robalo	Rio Robalo	river	356265	997437	131.132	1904	50	17	22.5	27.5	2800	4000		87.4	10.5	2.1			126417000	15113000	3041610
5	La Gloria	Rio La Gloria	river	361661	995195	11.6683	903	30	16	22.5	27.5	2800	4000		91.129	8.87097				10645700	1045560
6	Guanabo	Rio Guanabo	river	369331	989716	359	2304	66	18	22.5	27.5	2800	4000		89.4	10.3	0.3			284771000	32982500	950505
7	Guarumo	Rio Guarumo	river	364314	994239	25.3042	1511	36	17	22.5	27.5	2800	4000		96.2	0.757576	3			24332900	190101	760404
8	Melliza	Rio Melliza	stream	293245	904779	2.49791	192	18	7	25	30	2000	2800		53.8	46.2				1330710	1140610
9	Guanabano	Rio Guanabano	river	293352	912083	16.955	229	24	7	25	30	2000	2800		44.9	53.4	1.7			7604040	9029790	285151
10	Corotu	Rio Corotu	river	293804	913110	12.8488	247	25	7	25	30	2000	2800		21.875	78.125
11	Gannabito	Rio Gannabito	stream	293855	913315	2.42948	109			25	30	2000	2800		65.4	34.6				9505050	5037670
12	Rabo de Puerco	Qbda Rabo de Puerco	stream	294723	915440	14.5683	335	28	6	25	30	2000	2800		62.9032	33.871	3.22581
13	San Bartolo	Rio San Bartolo	river	296301	916566	52.0541	121	32	6	25	30	2000	2800		58.5	41.3			0.2	30511200	21576500		95050.5
14	Palo Blanco	Rio Palo Blanco	river	298894	920017	14.7565	62	4	1	25	30	2000	2800		61.3	38.7				9029790	5703030
15	Chiriqui Viejo	Rio Chiriqui Viejo	river	298266	943179	209.388	2461	29	3	22.5	27.5	2400	3400		38.8	61.2	0.04		0.03	254640000	401588000	285151		190101
16	Chiriqui Viejo	Rio Caisen	tributary	300754	961598	63.6625	1457	37	11			2400	3400
17	Chiriqui Viejo	Rio Gariche	tributary	304941	938493	160.174	1698	34	7	22.5	27.5	2400	3400		49.4	48.6	2			79462200	78321600	3231720
18	Platanal	Rio Platanal - Chiriqui	river	332644	935712	26.8012	169	7	3	22.5	27.5	2800	4000		13.2	87.8				3611920	23667600
19	Chiriqui	Rio Chiriqui	river	351523	929671	224.863	2136	53	8	22.5	27.5	2800	4000		71.7	23.6	3.3		1.3	435046000	143336000	20150700		7889190
20	Chiriqui	Rio Piedra	tributary	324422	939745	18.5632	2438			22.5	27.5	2400	3400		74.4	24.4	1.23885			128508000	42107400	1996060
21	Chiriqui	Rio Caldera	headwater tributary	346454	956225	205.513	3282	57	14	22.5	27.5	2400	3400		78.9	16.6	4.5			129554000	27279500	7413940
22	Chiriqui	Rio Esti	tributary	357456	943947	62.8926	1975	42	13	22.5	27.5	2400	3400		65.3	34.7				40966700	21766600
23	Gualaca	Rio Gualaca	tributary	358268	933366	605.846	2368	64	12	22.5	27.5	2400	3400
24	Chiriqui	Rio Cochea	tributary	354774	932633	238.841	3049	54	7	22.5	27.5	2400	3400		43.5	54.1	2.4			102559000	127463000	5703030
25	David	Rio David	river	344686	932316	275.686	2033	36	3	22.5	27.5	2800	4000		28.5	70.6	0.885559			78701800	194473000	2376260
26	Chiriqui	Rio Chico Concepcion	tributary	324385	939597	209.867	3424	64	10	22.5	27.5	2800	4000		40.4	58	1.6			90393000	129554000	3611920
27	Fonseca	Rio Fonseca	river	384303	915166	104.134	863	60	6	22.5	27.5	2800	4000		32.3	54.4	2.3			33457800	67675900	2376260
28	San Juan	Rio San Juan	river	393359	913962	140.738	1335	62	12	22.5	27.5	2800	4000		60.8	38.7	0.5			85450400	54368900	760404
29	San Felix	Rio San Felix	river	405028	914518	261.879	2336	67	17	22.5	27.5	2800	4000		69	27.5	3.47826			179170000	71477900	9219890
30	Santiago	Rio Santiago	river	419769	908175	209.696	1121	50	11	22.5	27.5	2800	4000		81.1	18.4	0.497288			169665000	38400400	1140610
31	Tabasara	Rio Tabasara	river	435575	907203	693.051	2210	69	14	22.5	27.5	2800	4000		73.1	19.2	7.7			506334000	133166000	53228300
32	Vigui	Rio Vigui	river	438230	906818	333.634	1937	42	12	22.5	27.5	2800	4000		43.9	35	21.1			146663000	116817000	70717500
33	Cobre	Rio Cobre	river	457641	908408	490.831	1715	39	9	22.5	27.5	2800	4000		38.8	33.9	27.3			190576000	166243000	134021000
34	San Pablo	Rio San Pablo	river	472211	906069	753.026	1897	62	11	22.5	27.5	2800	4000		40.1	35.2	24.7			301880000	264620000	186204000
35	San Pedro	Rio San Pedro	river	490430	902522	120.037	415	46	7	25	30	2800	4000		4	45.5	50.5			4847570	54654000	60547100
36	Santa Maria	Rio Santa Maria	river	534705	899336	1797	1823	47	6	22.5	27.5	2066.67	2933.33		30.5	45.3	24.2		0.07	547586000	812967000	433715000		1235660
37	Santa Maria	Rio Mulaba	headwater tributary	492212	942159	165.641	1558	63	17	22.5	27.5	2800	4000
38	Santa Maria	Rio Gatu	tributary	499014	917553	462.772	1861	48	12	22.5	27.5	2800	4000		45.4	24.1	30.5			210252000	111304000	141055000
39	Santa Maria	Rio Conaca	tributary	526169	896401	186.171	219	19	3	22.5	27.5	2066.67	2933.33		15.5	67.4	17.1			28990400	125657000	31841900
40	Grande	Rio Grande	river	554841	931243	508.265	1678	66	13	25	30	2066.67	2933.33		50	28.1	21.9			253880000	142576000	111209000
41	Grande	Rio Chico - Nata	major tributary	553005	919929	372.309	1727	46	10	25	30	2066.67	2933.33		31.7	46.9	21.4			117768000	174608000	79557200
42	Grande	Rio Cocle del Sur	tributary	562156	934710	377.852	1051	56	8	25	30	2066.67	2933.33		43.1	46.3	10.6			163107000	174893000	39921200
43	Escota	Rio Escota	river	541829	894670	289.056	201	23	2	25	30	1400	2000		5.6	69.5	24.7		0.46	15493200	201222000	71382900		1330710
44	Parita	Rio Parita	river	555561	882141	527.384	511	28	4	25	30	1400	2000		30.4	51.9	17.7			160350000	274126000	93434600
45	La Villa	Rio La Villa	river	563756	877880	919.3	942	32	7	25	30	1700	2400		38.4	48	13.6			351877000	439703000	124611000
46	Guarare	Rio Guarare	river	577246	865574	370.529	824	27	5	25	30	1700	2400		3.03726	52.9607	44.002			10930800	196469000	162916000
47	Valle Rico	Rio Valle Rico	river	571520	841842	131.132	826	32	10	25	30	1700	2400		20.8	70.6	8.5	0.1		27184400	92484100	11120900	190101
48	Limon	Rio Limon	river	565310	823189	77.478	844	51	13	25	30	2000	2800		28	58.3	13.7			21576500	44958900	10550600
49	Limon	Rio Tonosi	major tributary	561462	818316	606.915	1403	60	12	25	30	2000	2800		32	42.4	25.6			182972000	242854000	146663000
50	Limon	Rio Toleta	tributary	552942	867032	289.732	805	34	7	25	30	2000	2800		19.2	49.3	31.4	0.1		55889700	143146000	91248400
51	Limon	Rio Guerita	tributary	543134	837051	37.5542	611	31	11	25	30	2000	2800		29.4	9.1	61.5			11025900	3421820	23002200
52	Limon	Rio Agua Huence	headwater tributary	573500	833600	23.713	583	27	10	25	30	2000	2800		12.4	75.9	11.7			2946560	17964500	2756460
53	Limon	Rio Quema	headwater tributary	549428	829405	23.9	774	32	13	25	30	2000	2800		59.8	36.7	3.5			14257600	8744640	855454
54	Limon	Rio Flores	tributary	565595	823402	79.3344	693	33	10	25	30	2000	2800		8.2	55.2	36.6			6558480	43913300	29085400
55	Anton	Rio Anton	river	581615	928571	90.1387	1140	64	6	25	30	2066.67	2933.33		34.6	63.5	1.9			30606200	56174800	1710910
56	Anton	Rio Zarati	tributary	569713	942326	140.756	1046	51	8	25	30	2066.67	2933.33		62.3	37.0695	0.607698			87731600	52182700	855454
57	Hato	Rio Hato	river	591099	926735	56.5709	876	21	4	25	30	2066.67	2933.33		17.6	77.5	4.9236			9980300	43913300	2756460
58	Platanal	Rio Platanal - El Valle	river	601249	929110	12.3955	169	7	3	25	30	2066.67	2933.33		17.3	75.9	6.8			2186160	9600100	855454
59	Coton	Rio Coton	river	607283	933962	18.1612	263	10	3	25	30	1700	2400		7.9	85.3	6.8			1425760	15398200	1235660
60	Las Lajas	Rio Las Lajas	river	619042	943994	23.2254	565	27	5	25	30	1700	2400		6.9	86.6	6.5			1615860	20245700	1520810
61	Las Guias	Rio Las Guias	river	602809	931896	47.5116	858	30	7	25	30	2066.67	2933.33		27.9261	52.3614	19.7125
62	Corona	Rio Corona	river	609241	934031	46.4509	853	31	6	25	30	2066.67	2933.33		16.8	70.1	13.1			7794140	32602300	6083230
63	Camita	Rio Camita	river	622520	964402	24.4402	992	42	13	25	30	2000	2800		71.8	28.2				17394200	6843630
64	Chame	Rio Chame	river	622945	947741	196.086	1167	55	11	25	30	2066.67	2933.33		35	60.3113	4.6			68721500	118338000	9029790
65	Sajlices	Rio Sajlices	river	624524	960477	54.5948	993	43	9	25	30	2000	2800		30.8	64.5	4.5	0.2		16919000	35453800	2471310	95050.5
66	Perequete	Rio Perequete	river	646258	995402	69.8046	927	42	7	25	30	2000	2800		55.4	44.6				38685500	31176500
67	Caimito	Rio Caimito	river	638949	984975	435.116	579	29	5	25	30	2000	2800		44.5	53.3	2.2			193333000	231258000	9695150
68	Indio	Rio Indio - Colon	river	588858	1014933	575.957	1115	32	14	25	30	2800	4000		74.5	25.3	0.1		0.05	429438000	145902000	475252		285151
69	Salud	Rio Salud	river	595406	1017736	56.1517	160	25	7	25	30	2800	4000		89.2	8.4	2.4			50376700	4752520	1330710
70	Pina	Rio Pina - Colon	river	605740	1025752	55.6641	224	33	8	25	30	2800	4000		83.2	16.8				46669800	9410000
71	Cascajal	Rio Cascajal	river	651724	1056358	80.8571	904	59	10	25	30	2800	4000		75.7	24.3				61402600	19675400
72	Guanche	Rio Guanche	river	644386	1050319	47.8538	972	30	15	25	30	2800	4000		71.6	20.6	7.7			34313200	9885250	3706970
73	Piedra	Rio Piedra - Colon	river	638656	1044378	106.221	959	7	3	25	30	2800	4000		91	4.5	4.5			96856400	4752520	4847570
74	Nombre de Dios	Rio Nombre de Dios	river	666296	1058502	63.6369	491	35	8	25	30	2800	4000		89.2424	10.7576				56555000	6843630
75	Cuango	Rio Cuango	river	686100	1055100	143.664	733	38	10	25	30	2400	3400		68.6	30.6	0.8			98092100	43723200	1235660
76	Cuango	Rio Finca Cuango	major tributary	686400	1.04956e+06	25.518	678	30	13	25	30	2400	3400		63.6	19.5	8.8	8.1		16443700	5037670	2281210	2091110
77	Mandinga	Rio Mandinga	river	703189	1042406	291.383	886	31	9	25	30	2400	3400		80.3	6.7	8.4	4.6		233824000	19580400	24332900	13402100
78	Upper Chagres	Upper Rio Chagres	river	662404	1022567	214.264	1004	38	12	25	30	2400	3400		94.6	2.9	2.1		0.4	202743000	6178280	4562420		855454
79	Upper Chagres	Rio Chico	tributary	664040	1025009	41.2754	768	37	14	25	30	2800	4000		99.5	0.5				41061800	190101
80	Upper Chagres	Rio Limpio	tributary	670184	1.02913e+06	50.4715	828	36	13	25	30	2800	4000
81	Upper Chagres	Rio Piedras	tributary	675710	1.02644e+06	93.0044	990	33	14	25	30	2800	4000		97.6	0.2	2.2			90773200	190101	1996060
82	Upper Chagres	Rio Chagricito	tributary	684346	1035357	22.0963	1004	38	10	25	30	2800	4000		100					22051700
83	Upper Chagres	Rio Esperanza	tributary	680326	1036812	34.1837	773	38	11	25	30	2800	4000		96.9	3.1				33172600	1045560
84	Upper Chagres	Rio Playa Grande	tributary	680247	1037470	12.789	672	30	11	25	30	2800	4000		96.2	3.8				12166500	475252
85	Upper Chagres	Rio Indio Las Cascades	unconnected former tributary	675081	1017469	87.2473	1002	30	12	25	30	2400	3400		96.7	2.4	0.9			84119600	2091110	760404
86	Pequini	Rio Pequini	tributary	660976	1035763	158.01	826	43	10	25	30	2800	4000		96.5909	2.99043	0.41866			152461000	4752520	665353
87	Pequini	Rio San Miguel	tributary	666328	1038558	0.8	826	43	18	25	30	2800	4000
88	Agua Salud	Rio Agua Salud	river	634187	1017811	12.5238	263	17	5	25	30	2800	4000		45.8	54.2				5703030	6748580
89	Agua Salud	Rio Pelon	tributary	634578	1016160	4.18315	242	18	6	25	30	2800	4000		30.9524	69.0476
90	Sirystes	Rio Sirystes	river	636666	1013950	2.3867	236	19	7	25	30	2800	4000		78.2609	21.7391
91	Mendozo	Rio Mendozo	river	637007	1013518	0.9	314	1	1	25	30	2800	4000		65.9091	31.8182	2.27273
92	Frijoles	Rio Frijoles	river	638986	1011730	12.8146	331	21	8	25	30	2800	4000		89.4309	8.94309	1.62602
93	Gatuncillo	Rio Gatuncillo	river	648360	1022373	58.085	612	32	8	25	30	2800	4000		64.5	31.2	4.3			37354800	18059600	2471310
94	Gatun	Rio Gatun	river	634861	1027353	165.418	869	40	10	25	30	2800	4000		70.3	24.8	4.88372			116627000	41156800	8174340
95	Cabra	Rio Cabra	river	682521	1007636	2.42948	85	5	2	25	30	2000	2800		26.9	65.4	7.7			665353	1615860	190101
96	Pacora	Rio Pacora	river	688094	1003560	127.719	930	33	9	25	30	2000	2800		38.4	55.4	6.2			49046000	70717500	7984240
97	Pacora	Rio Paraiso	headwater tributary	682988	1021542	1.90765	866	26	11	25	30	2000	2800
98	Pacora	Rio Manolo	headwater tributary	681646	1020230	6.4843	928	25	9	25	30	2000	2800
99	Pacora	Rio Tartare	tributary	686694	1006970	26.6558	601	25	5	25	30	2000	2800		18.6	81.4				4942620	21671500
100	Pacora	Rio Cabobre	major tributary	689213	1006732	32.6354	813	32	11	25	30	2000	2800		7.3	90.7	2			2376260	29655700	665353
101	Pacora	Rio La Mesa Arriba	tributary	689005	1017770	12.7719	927	33	14	25	30	2000	2800
102	Pacora	Rio Bravo	tributary	684534	1013400	13.2937	813	32	11	25	30	2000	2800
103	Pacora	Rio Utive	tributary	684455	1012880	28.3667	916	29	12	25	30	2000	2800		92	7.3	0.7			11976400	950505	95050.5
104	Pacora	Rio Quebra	tributary	700156	1020930	5.70585	637	27	12	25	30	2000	2800
105	Pacora	Rio Tanquelo	tributary	687409	1013735	7.143	722	24	10	25	30	2000	2800
106	Pacora	Rio Iguana	tributary	688273	1023792	14.1406	886	32	14	25	30	2000	2800
107	Pacora	Rio Cana Blanca	tributary	692322	1017370	5.39788	551	27	8	25	30	2000	2800
108	Pacora	Rio Indio	major tributary	694454	1018088	22.1904	578	28	11	25	30	2000	2800		93.4	6.6				5417880	380202
109	Mamoni	Rio Mamoni	river	711555	1017410	246	881	30	10	25	30	2000	2800		52.1888	32.2802	15.531			128033000	79177000	38210300
110	Carti Grande	Rio Carti Grande	river	722333	1042015	112.919	564	29	9	25	30	2000	2800		95.9	1.6	0.2	2.3431		108453000	1805960	285151	2566360
111	Tumanganti	Rio Tumanganti	river	730278	1021021	252.46	718	35	8	25	30	2000	2800		75.3	14	9.5	1	0.2	190861000	35643900	24047800	2471310	570303
112	Playa Blanca	Rio Playa Blanca	river	746503	1021825	27.2461	721	31	11	25	30	2000	2800		76.5	5.9	6.6	11.1		21006200	1615860	1805960	3041610
113	Aguas Claras	Rio Aguas Claras	river	754495	1026166	4.72208	444	26	11	25	30	2000	2800		38.8	14	12.9	34.3		30321100	11025900	10075300	26804200
114	Espave	Rio Espave	river	755181	1024863	78.7013	712	41	14	25	30	2000	2800		98	2				4657470	95051
115	Lorena	Rio Lorena	river	759689	1020588	61.1304	709	33	12	25	30	2000	2800		48.5	35.8	12.4	3.3		29655700	21861600	7604040	1996060
116	Piragua	Rio Piragua	river	764201	1019311	23.9012	698	32	12	25	30	2000	2800		84.5	6.8		8.8		20150700	1615860		2091110
117	Diablo	Rio Diablo	river	772977	1018524	132.483	689	34	8	25	30	2000	2800		38.5	35.2	8.4	17.9		51042100	46669800	11216000	23667600
118	Chepo	Rio Chepo	river	787130	1017957	83.0556	777	35	11	25	30	2000	2800		39.9	18.1	18.1	23.9		33172600	15018000	15018000	19865500
